# Supplementary material for: Patient Endothelial Colony-Forming Cells to Model Coronary Artery Disease Susceptibility and Unravel the Role of Dysregulated Mitochondrial Redox Signalling
Source: MDPI journal article supplement (doi:10.3390/antiox10101547), 2021-09-29
Supplement: s1 [file s1]

## Supplemental Figures

**ECFC Days to Growth by Gensini Score**

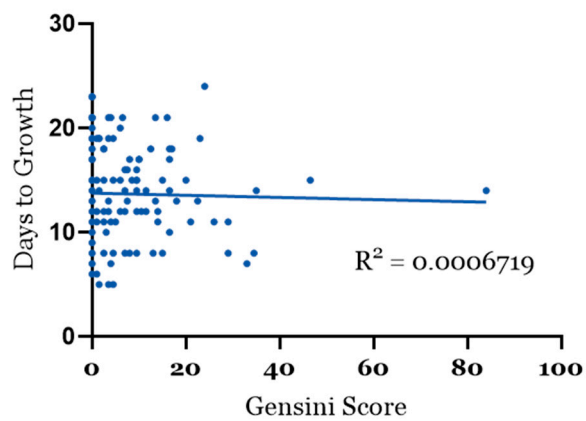

**Supplement Figure S1:** Scatterplot with linear regression line reflecting days until ECFC formation from adult peripheral blood mononuclear cells, demonstrating a lack of correlation with Gensini score. n=112.

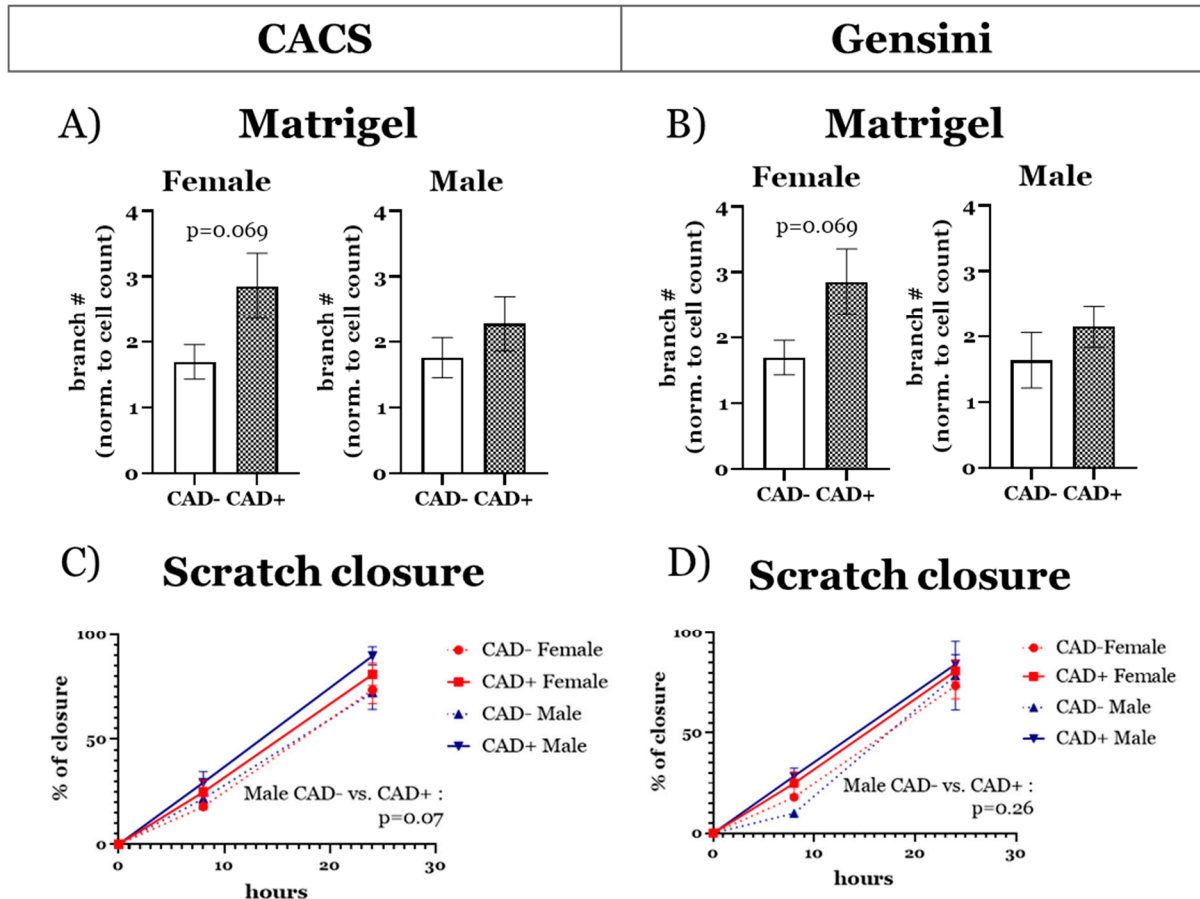

**Supplement Figure S2: Sex segregation of ECFC function analysis in patients with or without CAD.** Matrigel tube formation and scratch closure abilities were assessed in vitro on ECFCs from patients with CAD (CAD+) or not (CAD-). The presence of CAD was determined using CACS or Gensini score. Groups were split between females and males using biological sex difference. The sex segregated difference of tube formation of ECFCs from patients with or without CAD classified by either CACS (A) or Gensini score (B) is represented. Results are presented as mean  $\pm$  SEM. Sample size: CACS=0, female = 7, male = 11; CACS>0, female = 8, male = 10; Gensini=0, female = 7, male = 6; Gensini>0, female = 8, male = 15. C-D) Scratch assays were performed on a confluent cell monolayer in 96 well plates. Results are presented as mean percentage of closure over time  $\pm$  SEM. F and G) show the difference of closure abilities of ECFCs from patients with or without CAD classified by either CACS (C) or Gensini (D) score in a sex segregated way. Sample size: CACS=0, female = 4, male = 5; CACS>0, female = 6, male = 9 ; Gensini=0, female = 4, male = 2; Gensini>0, female = 6, male = 12.

## Supplemental Tables

| <b>Supplemental Table S1: Univariate Associations with ECFC Growth</b> |                   |                 |                |
|------------------------------------------------------------------------|-------------------|-----------------|----------------|
| <b>Variable</b>                                                        | <b>Odds Ratio</b> | <b>95% C.I.</b> | <b>p value</b> |
| Age                                                                    | 1.01              | 1.00 – 1.03     | 0.144          |
| Female sex                                                             | 1.35              | 0.97 – 1.89     | 0.074          |
| Obese (BMI >30)                                                        | 0.62              | 0.40 – 0.95     | <b>0.027</b>   |
| Hypertension                                                           | 1.45              | 1.03 – 2.02     | <b>0.031</b>   |
| Diabetes Mellitus                                                      | 0.84              | 0.45 – 1.57     | 0.575          |
| Hypercholesterolaemia                                                  | 1.02              | 0.73 – 1.43     | 0.909          |
| Significant Smoking History CAD                                        | 1.09              | 0.74 – 1.61     | 0.665          |
| Current Smoker                                                         | 0.73              | 0.36 – 1.47     | 0.379          |
| Significant Family History                                             | 0.75              | 0.48 – 1.17     | 0.200          |
| No SMuRFs                                                              | 0.56              | 0.36 – 0.87     | <b>0.010</b>   |
| Statin                                                                 | 1.18              | 0.84 – 1.67     | 0.337          |
| Anti-platelet                                                          | 1.04              | 0.67 – 1.61     | 0.854          |
| Anti-coagulant                                                         | 1.15              | 0.66 – 2.00     | 0.627          |
| Beta-blocker                                                           | 0.73              | 0.44 – 1.20     | 0.214          |
| ACE/ARB                                                                | 1.30              | 0.91 – 1.84     | 0.145          |
| Calcified plaque present (CACS>0)                                      | 1.09              | 0.77 – 1.53     | 0.629          |
| CAD present (Gensini>0)                                                | 1.05              | 0.74 – 1.49     | 0.801          |
| Obstructive Disease (> 50% Stenosis)                                   | 0.60              | 0.38 – 0.95     | <b>0.027</b>   |

| <b>Supplemental Table S2: Adjusted Associations with ECFC Growth – Adjusted for age, sex, obesity, hypertension and obstructive CAD</b> |                   |                 |                |
|-----------------------------------------------------------------------------------------------------------------------------------------|-------------------|-----------------|----------------|
| <b>Variable</b>                                                                                                                         | <b>Odds Ratio</b> | <b>95% C.I.</b> | <b>p value</b> |
| Age                                                                                                                                     | 1.01              | 1.00 – 1.03     | 0.171          |
| Female sex                                                                                                                              | 1.20              | 0.85 – 1.69     | 0.308          |
| Obese (BMI >30)                                                                                                                         | 0.56              | 0.36 – 0.87     | <b>0.010</b>   |
| Hypertension                                                                                                                            | 1.68              | 1.18 – 2.41     | <b>0.004</b>   |
| Diabetes Mellitus                                                                                                                       | 0.83              | 0.44 – 1.59     | 0.579          |
| Hypercholesterolaemia                                                                                                                   | 0.87              | 0.61 – 1.24     | 0.451          |
| Significant Smoking History CAD                                                                                                         | 1.24              | 0.82 – 1.88     | 0.301          |
| Current Smoker                                                                                                                          | 0.80              | 0.39 – 1.64     | 0.544          |
| No SMuRFs                                                                                                                               | 0.62              | 0.38 – 1.01     | 0.057          |
| Significant Family History                                                                                                              | 0.74              | 0.47 – 1.16     | 0.183          |
| Statin                                                                                                                                  | 1.07              | 0.74 – 1.54     | 0.731          |
| Anti-platelet                                                                                                                           | 0.96              | 0.62 – 1.50     | 0.865          |
| Anti-coagulant                                                                                                                          | 1.07              | 0.60 – 1.92     | 0.816          |
| Beta-blocker                                                                                                                            | 0.68              | 0.40 – 1.15     | 0.153          |
| ACE/ARB                                                                                                                                 | 0.96              | 0.58 – 1.60     | 0.881          |
| Calcified plaque present (CACS>0)                                                                                                       | 1.17              | 0.78 – 1.76     | 0.453          |
| CAD present (Gensini>0)                                                                                                                 | 1.12              | 0.74 – 1.71     | 0.587          |
| Obstructive Disease (> 50% Stenosis)                                                                                                    | 0.48              | 0.29 – 0.80     | <b>0.004</b>   |

| <b>Supplemental Table S3: Days to Colony Formation by Clinical Subgroups</b> |                              |                             |                |
|------------------------------------------------------------------------------|------------------------------|-----------------------------|----------------|
| <b>Factor</b>                                                                | <b>Days - Factor Present</b> | <b>Days - Factor Absent</b> | <b>p value</b> |
| Sex – female                                                                 | 13.7 (4.4)                   | 13.7 (4.5)                  | 0.91           |
| Obese (BMI > 30)                                                             | 14.8 (4.3)                   | 13.5 (4.5)                  | 0.23           |
| Hypertension                                                                 | 14.1 (4.8)                   | 13.3 (4.2)                  | 0.33           |
| Diabetes Mellitus                                                            | 14.5 (3.6)                   | 13.6 (4.5)                  | 0.55           |
| Hyperlipidaemia                                                              | 13.8 (4.5)                   | 13.5 (4.5)                  | 0.69           |
| Current Smokers                                                              | 11.7 (5.0)                   | 13.8 (4.4)                  | 0.26           |
| Significant Smoking History                                                  | 12.7 (4.3)                   | 14.0 (4.5)                  | 0.17           |
| Significant Family History                                                   | 13.3 (5.2)                   | 13.8 (4.3)                  | 0.65           |
| Anti-coagulated                                                              | 12.8 (4.2)                   | 13.8 (4.5)                  | 0.42           |
| Taking anti-platelet agent                                                   | 13.7 (4.3)                   | 13.7 (4.5)                  | 0.96           |
| Taking statin                                                                | 14.1 (3.8)                   | 13.5 (4.8)                  | 0.44           |
| Takin beta-blocker                                                           | 13.7 (5.0)                   | 13.7 (4.4)                  | 0.97           |
| Taking ACE/ARB agent                                                         | 13.9 (4.4)                   | 13.3 (4.6)                  | 0.58           |
| CAD present (Gensini > 0)                                                    | 13.5 (4.3)                   | 14.2 (4.8)                  | 0.37           |
| Obstructive Disease > 50% Stenosis                                           | 13.8 (4.4)                   | 13.7 (4.5)                  | 0.90           |

| <b>Supplemental Table S4: ECFC Signalling Molecule Expression in Disease – Calcium Score</b> |                          |                          |                |
|----------------------------------------------------------------------------------------------|--------------------------|--------------------------|----------------|
| <b>Target (n CAD- vs n CAD+)</b>                                                             | <b>CAD- (mean ± sem)</b> | <b>CAD+ (mean ± sem)</b> | <b>p value</b> |
| NOX2 -Male (8 vs 9)                                                                          | 1.00 ± 0.27              | 0.71 ± 0.21              | 0.50           |
| -Female (6 vs 8)                                                                             | 1.00 ± 0.38              | 1.27 ± 0.48              | 0.68           |
| NOX4 -Male (6 vs 8)                                                                          | 1.00 ± 0.16              | 1.56 ± 0.53              | 0.34           |
| -Female (5 vs 6)                                                                             | 1.00 ± 0.61              | 1.37 ± 0.52              | 0.65           |
| eNOS -Male (8 vs 9)                                                                          | 1.00 ± 0.45              | 1.36 ± 0.66              | 0.67           |
| -Female (6 vs 7)                                                                             | 1.00 ± 0.39              | 1.32 ± 0.62              | 0.68           |
| AKT -Male (8 vs 9)                                                                           | 1.00 ± 0.56              | 0.35 ± 0.19              | 0.27           |
| -Female (5 vs 9)                                                                             | 1.00 ± 0.73              | 2.80 ± 0.86              | 0.19           |
| pAKT -Male (8 vs 9)                                                                          | 1.00 ± 0.25              | 0.71 ± 0.21              | 0.39           |
| -Female (5 vs 9)                                                                             | 1.00 ± 0.18              | 2.38 ± 0.74              | 0.11           |
| pAKT/AKT - Male (8 vs 9)                                                                     | 1.00 ± 0.22              | 0.98 ± 0.26              | 0.96           |
| - Female (5 vs 9)                                                                            | 1.00 ± 0.34              | 0.44 ± 0.14              | 0.09           |
| ERK -Male (7 vs 9)                                                                           | 1.00 ± 0.11              | 1.37 ± 0.32              | 0.35           |
| -Female (5 vs 9)                                                                             | 1.00 ± 0.27              | 1.33 ± 0.40              | 0.58           |
| pERK -Male (7 vs 9)                                                                          | 1.00 ± 0.43              | 0.95 ± 0.83              | 0.96           |
| -Female (5 vs 9)                                                                             | 1.00 ± 0.87              | 2.73 ± 1.03              | 0.23           |
| pERK/ERK -Male (7 vs 9)                                                                      | 1.00 ± 0.41              | 0.44 ± 0.29              | 0.27           |
| -Female (5 vs 9)                                                                             | 1.00 ± 0.71              | 2.42 ± 0.97              | 0.22           |

| <b>Supplemental Table S5: ECFC Signalling Molecule Expression in Disease – Gensini</b> |                          |                          |                |
|----------------------------------------------------------------------------------------|--------------------------|--------------------------|----------------|
| <b>Target (n CAD- vs n CAD+)</b>                                                       | <b>CAD- (mean ± sem)</b> | <b>CAD+ (mean ± sem)</b> | <b>p value</b> |
| NOX2 -Male (4 vs 13)                                                                   | 1.00 ± 0.29              | 1.37 ± 0.31              | 0.61           |
| -Female (5 vs 9)                                                                       | 1.00 ± 0.41              | 1.10 ± 0.39              | 0.84           |
| NOX4 -Male (2 vs 12)                                                                   | 1.00 ± 0.07              | 1.27 ± 0.43              | 0.81           |
| -Female (4 vs 7)                                                                       | 1.00 ± 0.77              | 1.09 ± 0.50              | 0.75           |
| eNOS -Male (4 vs 13)                                                                   | 1.00 ± 0.45              | 3.62 ± 1.28              | 0.29           |
| -Female (5 vs 8)                                                                       | 1.00 ± 0.41              | 1.09 ± 0.50              | 0.90           |
| AKT -Male (4 vs 13)                                                                    | 1.00 ± 0.79              | 0.30 ± 0.67              | 0.44           |
| -Female (4 vs 10)                                                                      | 1.00 ± 0.73              | 2.06 ± 0.12              | 0.38           |
| pAKT -Male (4 vs 13)                                                                   | 1.00 ± 0.34              | 0.56 ± 0.12              | 0.15           |
| -Female (4 vs 10)                                                                      | 1.00 ± 0.18              | 2.02 ± 0.63              | 0.15           |
| pAKT/AKT - Male (4 vs 13)                                                              | 1.00 ± 0.38              | 1.06 ± 0.21              | 0.90           |
| - Female (4 vs 10)                                                                     | 1.00 ± 0.42              | 0.74 ± 0.24              | 0.62           |
| ERK -Male (3 vs 13)                                                                    | 1.00 ± 0.16              | 1.37 ± 0.27              | 0.32           |
| -Female (4 vs 10)                                                                      | 1.00 ± 0.22              | 1.33 ± 0.31              | 0.95           |
| pERK -Male (3 vs 13)                                                                   | 1.00 ± 0.82              | 1.58 ± 0.91              | 0.77           |
| -Female (4 vs 10)                                                                      | 1.00 ± 0.89              | 2.00 ± 0.78              | 0.42           |
| pERK/ERK -Male (3 vs 13)                                                               | 1.00 ± 0.75              | 0.74 ± 0.32              | 0.73           |
| -Female (4 vs 10)                                                                      | 1.00 ± 0.78              | 1.95 ± 0.78              | 0.49           |

### Supplemental Legends for Video file

Video of patient-derived mini artery. ECFCs rapidly form a confluent monolayer when grown in 3D under physiological conditions. As described in the methods, a vascular bioreactor system facilitates 3D cell growth on fibrous PCL-gelatin scaffolds. Seeded ECFCs are exposed to pulsatile pressure approximating human physiology, at 37C, with arterial pressure of ~120 mm Hg systolic and ~90 mm Hg diastolic.
